# Supplementary material for: Clinical Significance of Preoperative Albumin and Globulin Ratio in Patients with Gastric Cancer Undergoing Treatment
Source: Hindawi journal article supplement (doi:10.1155/2017/3083267), 2017-01-01
Supplement: f1 [file 3083267.f1.pdf]

**Supplement 1. Prognostic value of AGR for overall survival in whole GC patients by univariate and multivariate analyses.**

| characteristics                | Univariate analysis |             |                | Multivariate analysis |             |                |
|--------------------------------|---------------------|-------------|----------------|-----------------------|-------------|----------------|
|                                | Hazard ratio        | 95% CI      | <i>p</i> value | Hazard ratio          | 95% CI      | <i>p</i> value |
| Sex                            |                     |             |                |                       |             |                |
| Male vs. Female                | 0.998               | 0.778-1.279 | 0.985          |                       |             |                |
| Age (yr)                       |                     |             |                |                       |             |                |
| ≤ 59 vs. > 59                  | 1.350               | 1.073-1.698 | 0.010          | 1.266                 | 0.913-1.755 | 0.157          |
| Primary tumor size (cm)        |                     |             |                |                       |             |                |
| < 4.0 vs. ≥4.0                 | 1.779               | 1.335-2.370 | <0.001         | 1.188                 | 0.817-1.727 | 0.366          |
| Tumor location                 |                     |             |                |                       |             |                |
| Proximal vs. Remote vs. Other  | 1.195               | 1.007-1.419 | 0.042          | 1.247                 | 0.997-1.561 | 0.054          |
| Degree of differentiation      |                     |             |                |                       |             |                |
| Poorly vs. Moderately vs. Well | 1.336               | 0.882-2.023 | 0.171          |                       |             |                |
| Distant metastasis             |                     |             |                |                       |             |                |
| No vs. Yes                     | 6.113               | 4.787-7.807 | <0.001         | 2.247                 | 1.504-3.356 | <0.001         |
| Surgery                        |                     |             |                |                       |             |                |
| No vs. Yes                     | 0.469               | 0.358-0.613 | <0.001         | 1.229                 | 0.819-1.843 | 0.320          |
| TNM category (AJCC, 7th)       |                     |             |                |                       |             |                |
| I+II vs. III+IV                | 5.320               | 3.246-8.721 | <0.001         | 2.962                 | 1.627-5.393 | <0.001         |
| ALB                            |                     |             |                |                       |             |                |
| ≤41.7 vs. >41.7                | 0.695               | 0.552-0.875 | 0.002          | 0.963                 | 0.690-1.344 | 0.825          |
| GLB                            |                     |             |                |                       |             |                |
| ≤27.4 vs. >27.4                | 1.205               | 0.957-1.517 | 0.112          |                       |             |                |
| NLR                            |                     |             |                |                       |             |                |
| ≤2.08 vs. > 2.08               | 1.934               | 1.517-2.466 | <0.001         | 1.442                 | 1.028-2.023 | 0.034          |
| PLR                            |                     |             |                |                       |             |                |
| ≤140.63 vs. >140.63            | 1.730               | 1.367-2.190 | <0.001         | 1.023                 | 0.721-1.453 | 0.897          |
| AGR                            |                     |             |                |                       |             |                |
| ≤1.50 vs. > 1.50               | 0.648               | 0.514-0.817 | <0.001         | 0.630                 | 0.451-0.879 | 0.007          |

In univariate analysis, age (HR:1.50, 95%CI=1.073-1.698,  $p=0.010$ ), primary tumor size (HR:1.779, 95%CI=1.335-2.370,  $p<0.001$ ), tumor location(HR:1.195, 95%CI=1.007-1.419,  $p=0.042$ ), distant metastasis (HR:6.113, 95%CI=4.787-7.807,  $p<0.001$ ), surgery (HR:0.469, 95%CI=0.358-0.613,  $p<0.001$ ), the TNM category (HR:5.320, 95%CI=3.246-8.721,  $p<0.001$ ), ALB (HR:0.695, 95%CI=0.552-0.875,  $p=0.002$ ), PLR (HR:1.730, 95%CI=1.367-2.190,  $p<0.001$ ), NLR (HR:1.94, 95%CI=1.517-2.466,  $p<0.001$ ) and AGR (HR:0.648, 95%CI=0.514-0.817,

$p<0.001$ ) were significantly associated with OS. Multivariate analysis (Cox proportional hazards model) identified distant metastasis (HR: 2.247, 95%CI=1.504-3.356,  $p<0.001$ ), the TNM category (HR:2.962, 95%CI=1.627-5.393,  $p<0.001$ ), NLR (HR: 1.442, 95%CI=1.028-2.023,  $p=0.011$ ) and AGR (HR: 0.630, 95%CI=0.451-0.879,  $p=0.007$ ) as independent prognostic factors. ALB and GLB were not significantly associated with OS.
